# Supplementary material for: A bifunctional solid oxide electrolysis cell for simultaneous CO2 utilization and synthesis gas production
Source: Royal Society of Chemistry journal article supplement (doi:10.1039/c6cc03503e), 2016-01-01
Supplement: c6cc03503e1.pdf [file c6cc03503e1.pdf]

## Supplementary Information

### **A Bifunctional Solid Oxide Electrolysis Cell for Simultaneous CO<sub>2</sub> Utilization and Synthesis Gas Production**

Yi-Fei Sun<sup>a</sup>, Yi-Yang Wu<sup>b</sup>, Ya-Qian Zhang<sup>a</sup>, Yu Luo<sup>b</sup>, Yi-Xiang Shi<sup>b\*</sup>,  
Bin Hua<sup>a, \*</sup>, Jian-Hui Li<sup>c</sup>, Jing-Li Luo<sup>a, \*</sup>

<sup>a</sup> Department of Chemical and Materials Engineering, University of Alberta,  
Alberta, Canada, T6G 1H9.

<sup>b</sup> Key Laboratory for Thermal Science and Power Engineering of Ministry  
of Education, Tsinghua University, Beijing, China, 100084

<sup>c</sup> National Engineering Laboratory for Green Chemical Productions of  
Alcohols-Ethers-Esters, College of Chemistry and Chemical Engineering,  
Xiamen University, Xiamen, China, 361005

## **Experimental Procedure**

### **Material preparation and cell fabrication**

The  $\text{Pr}_{0.5}\text{Ba}_{0.5}\text{Mn}_{0.9}\text{Co}_{0.1}\text{O}_3$  used as cathode material were prepared by a modified sol-gel method. Certain amount of dissolving Co, Pr, Ba and Mn nitrate salts were mixed and dissolved in de-ionized water with the addition of quantitative amounts of citric acid and ethylene glycol (the mol ratio of metal ion: citric acid: ethylene glycol is equal to 1:3:1.5), the PH value of the solution was carefully adjusted to  $\sim 8$  by adding suitable amount of ammonium hydroxide. And then, the solution was continuously stirred on a hotplate at  $60\text{ }^\circ\text{C}$  overnight until the gel forms. After that, the gel was slowly decomposed at  $350\text{ }^\circ\text{C}$  for 2 hours and calcined in air at  $950\text{ }^\circ\text{C}$  for 4 hours at the rate of  $2\text{ }^\circ\text{C min}^{-1}$ . The prepared materials were denoted as PBMCo. The Gadolinium doped ceria (GDC) was used as buffer layer between cathode and electrode. The cathode was a mixture of equal weights of GDC and PBMCo. The anode matrix was a mixture of equal weights of YSZ powder (TOSHO Co. Ltd.) and strontium doped lanthanum manganese (LSM). The active area of electrode is equal to  $1\text{ cm}^2$ .

The Ru infiltrated LSM composites were prepared by solution impregnation of the Ruthenium(III) chloride solution into the LSM layer to reach the Ru weight ratio of 5 wt%. The infiltrated electrodes were finally fired at  $700\text{ }^\circ\text{C}$  for 2 h.

### **Electrochemical performance evaluation procedure**

During SOEC test, Au paste, used as the current collectors, were brushed on the anode and cathode of the cells, respectively. The cell was then sealed on an axial alumina tube setup using a Ceramabond<sup>®</sup> 503 glass sealant (Aremco Products, Inc.). The current density-voltage (I-V) curve were obtained at different applied voltages and temperatures ranging from  $800$  to  $900\text{ }^\circ\text{C}$ . The fuel flow rate of  $70\%\text{CO}_2\text{-CO}$  to cathode chamber was carefully controlled in order to ensure the sufficient flux of oxygen ions to anode. An impedance/gain phase analyzer (Solartron 1255) and an electrochemical interface (Solartron 1287) were used to record the electrochemical performances. The stability and selectivity of the electrode catalyst for partial

oxidation reaction of methane occurring in anode chamber was tested at fixed flow rate and gas composition at various temperatures. A dilute methane stream composed of CH<sub>4</sub> (5 vol%) was used as fuel to anode chamber.

The heterogeneous catalytic activities of the anode materials for partial oxidation of methane were also evaluated in a fixed-bed quartz reactor (5mm inner diameter). 100 mg catalyst were packed in the center of the reactor using quartz wool. The reactor was kept in a tubular furnace. Before carrying out the reaction, the catalyst was reduced using 10% H<sub>2</sub>-N<sub>2</sub> at 800 °C for 1 h. The mixture of CH<sub>4</sub>/O<sub>2</sub>/Ar (ratio of 2:1:38) were injected into fix-bed reactor at a gas hourly space velocity (GHSV) of 1.0×10<sup>5</sup> mL·g<sup>-1</sup>·h<sup>-1</sup>.

The composition of the effluent gas was analysed using a gas chromatography (GC, Agilent 5890) equipment with TDX-01 molecular sieve column and Ar as carrier gas. CH<sub>4</sub> conversion, CO selectivity and H<sub>2</sub> selectivity were calculated by equations (1), (2) and (3), respectively.

$$\text{Con}(\text{CH}_4 (\%)) = \frac{\text{moles of CH}_4 \text{ converted}}{\text{moles of CH}_4 \text{ in feed}} * 100 \quad (1)$$

$$\text{Sel}(\text{CO}(\%)) = \frac{\text{moles of CO in products}}{\text{moles of CO in products} + \text{moles of CO}_2 \text{ in products}} * 100 \quad (2)$$

$$\text{Sel}(\text{H}_2 (\%)) = \frac{\text{moles of H}_2 \text{ produced}}{2 \times \text{moles of CH}_4 \text{ converted}} * 100 \quad (3)$$

The microstructures of the cells were examined using a scanning electron microscopy (SEM, JEOL 6301F).

The temperature-programmed oxidation (TPO) method was adopted to characterize the carbon deposition using a Thermogravimetric Analysis (TGA) and the compositions of effluents were analyzed with the mass spectrometer (MS).

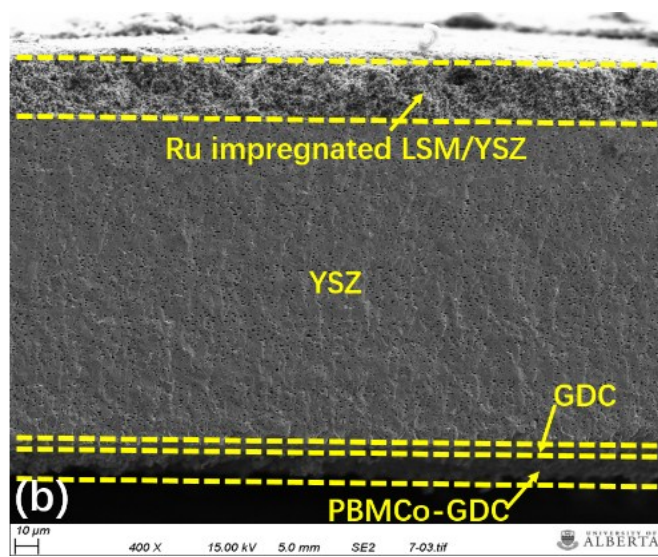

Fig. S-1. Microstructure of the Ru impregnated LSM-YSZ /YSZ/GDC/PBMCo-GDC configuration

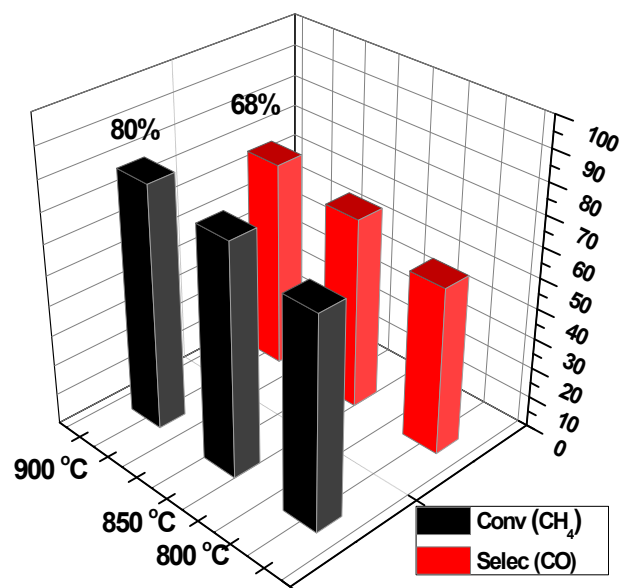

Figure S-2 CH<sub>4</sub> conversion and CO selectivity of LSM/YSZ catalyst as a function of temperature in a regular fixed bed

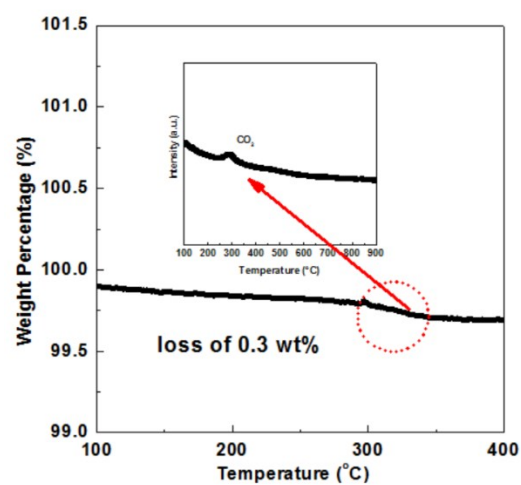

Figure S-3. The Temperature Programmed Oxidation (TPO) test for anode material after test performed on TGA-MS

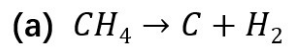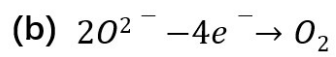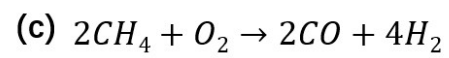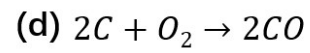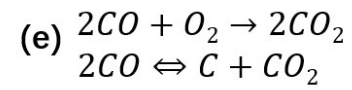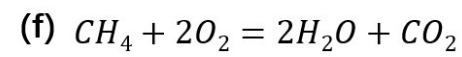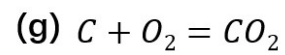

Figure S-4 The possible reaction pathways involved on anode for the cell shown in Figure 4.
